# Supplementary material for: Perturbation-based analysis and modeling of combinatorial regulation in the yeast sulfur assimilation pathway
Source: PubMed Central journal article supplement — Mol Biol Cell. 2012 Aug 1;23(15):2993–3007. doi: 10.1091/mbc.E12-03-0232 (PMC3408425; doi:10.1091/mbc.e12-03-0232), 2012-08-01
Supplement: supp_E12-03-0232_MetPaperSupplement-v4_revision2.pdf [file supp_E12-03-0232_MetPaperSupplement-v4_revision2.pdf]

**Supplement for “Perturbation-based analysis and modeling of combinatorial regulation in the yeast sulfur assimilation pathway”**

R. Scott Mclsaac<sup>1,2</sup>, Allegra A. Petti<sup>1</sup>, Harmen J. Bussemaker<sup>3</sup>, and David Botstein<sup>1,4</sup>

<sup>1</sup>The Lewis-Sigler Institute for Integrative Genomics, Princeton University, Princeton, NJ 08544, USA.

<sup>2</sup>Graduate Program in Quantitative and Computational Biology, Princeton University, Princeton, NJ 08544, USA.

<sup>3</sup>Department of Biological Sciences, Columbia University, New York, NY, 10027, USA.

<sup>4</sup>Department of Molecular Biology, Princeton University, Princeton, NJ 08544, USA.

## Differential equation model in Figure 5A

While equations 1-4 in the main text were derived from standard descriptions of transcription, translation, and mass-action kinetics, the derivation of Equation 5 deserves more detail. Consider three protein species, an activator (A), repressor (R), and non-specific factor (X) which recognize the same promoter binding site. If these proteins are in equilibrium with DNA, then:

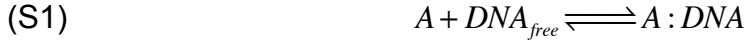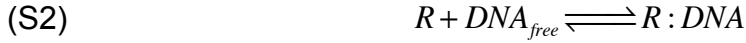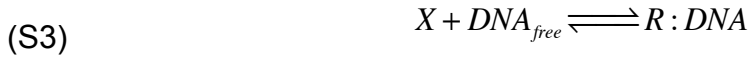

The dissociation constants of A, R, and X are  $K_{d,A}$ ,  $K_{d,R}$ , and  $K_{d,X}$ , respectively, and this results in:

$$(S4) \quad [A] \cdot [DNA]_{free} = K_{d,A} \cdot [A : DNA]$$

$$(S5) \quad [R] \cdot [DNA]_{free} = K_{d,R} \cdot [R : DNA]$$

$$(S6) \quad [X] \cdot [DNA]_{free} = K_{d,X} \cdot [X : DNA]$$

The occupancy of A at the binding site is given by:

$$(S7) \quad O_A = \frac{[A : DNA]}{[DNA]_{free} + [A : DNA] + [R : DNA] + [X : DNA]}$$

By definition,  $K_d = \frac{1}{K_a}$ . Using this relation and substituting (S4-S6) into (S7) we obtain:

$$(S8) \quad O_A = \frac{K_{a,A}[A]}{1 + K_{a,A}[A] + K_{a,R}[R] + K_{a,X}[X]}$$

We can then write the rate of change of target transcription,  $\frac{d[M]_{TARGET}}{dt}$ , as

$$(S10) \quad \frac{d[M(t)]_{TARGET}}{dt} = \mu_A O_A(t) + \mu_R O_R(t) + \mu_X O_X(t) - \frac{1}{\tau} [M(t)]_{TARGET},$$

where we have assumed first-order degradation of transcripts. We then set  $\mu_R = 0$  and  $K_{a,X}[X] = x_0$  where  $x_0$  is an effective parameter of the affinity and concentration of the non-specific factor. This results in

$$(S11) \quad \frac{d[M(t)]_{TARGET}}{dt} = \frac{\mu_A K_{a,A}[A(t)] + \mu_X x_0}{1 + x_0 + K_{a,A}[A(t)] + K_{a,R}[R(t)]} - \frac{1}{\tau} [M(t)]_{TARGET}$$

which is the functional form of Equation 5 in the main text. Descriptions of parameters for the full model in the text are contained in Table S1.

**Table S1: Parameter values and descriptions for simulations in Figure 5A**

| Parameter                  | Description                                                                                                                                                        | Value                                                                  |
|----------------------------|--------------------------------------------------------------------------------------------------------------------------------------------------------------------|------------------------------------------------------------------------|
| $M_{CBF1}(t)$              | number of co-factor mRNAs                                                                                                                                          | 0 (at $t = 0$ )                                                        |
| $P_{CBF1}(t)$              | number of co-factor proteins                                                                                                                                       | 0 (at $t = 0$ )                                                        |
| $P_{CBF1,MET4,COMPLEX}(t)$ | number of trans-activator complexes                                                                                                                                | 0 (at $t = 0$ )                                                        |
| $M_{TARGET}(t)$            | number of target transcripts produced                                                                                                                              | 0 (at $t = 0$ )                                                        |
| $P_{MET4,TOTAL}$           | number of activator proteins                                                                                                                                       | 0 or 2000                                                              |
| $\mu_1(t)$                 | rate of transcription of <i>CBF1</i> downstream of $P_{GAL1}$                                                                                                      | 0 $\text{min}^{-1}$ prior to pulse,<br>4 $\text{min}^{-1}$ after pulse |
| $\mu_2$                    | strength of activation of $M_{TARGET}(t)$ by<br>$P_{CBF1,MET4,COMPLEX}(t)$                                                                                         | 3 $\text{min}^{-1}$                                                    |
| $\mu_3$                    | strength of activation of $M_{TARGET}(t)$ by $x_0$                                                                                                                 | 1 $\text{min}^{-1}$                                                    |
| $\tau_1$                   | mRNA half-life                                                                                                                                                     | 10 min                                                                 |
| $\tau_2$                   | protein half-life                                                                                                                                                  | 20 min                                                                 |
| $\tau_3$                   | effective parameter (time delay between activator complex formation and finding the correct binding site, recruiting RNA polymerase, and transcription initiation) | 5 min                                                                  |
| $\beta_1$                  | translation rate                                                                                                                                                   | 3 $\text{min}^{-1}$                                                    |
| $\gamma_1$                 | effective parameter that accounts for fast formation of Cbf1p dimers, formation of active complexes with Met4p, and a slow dissociation of these complexes         | 3 $\text{min}^{-1}$                                                    |
| $K_a$                      | strength of TF binding                                                                                                                                             | 1                                                                      |
| $x_0$                      | effective parameter of the affinity and amount of non-specific factor                                                                                              | 1                                                                      |

### Differential equation model of a Met4p/Met32p feed-forward loop

$$(S12) \quad \frac{dM_{MET4}(t)}{dt} = \mu_1(t) - \frac{1}{\tau_1} M_{MET4}(t)$$

$$(S13) \quad \frac{dP_{MET4}(t)}{dt} = \beta_1 M_{MET4}(t) - \gamma_1 P_{MET4}(t) P_{MET32}(t) - \frac{1}{\tau_2} P_{MET4}(t)$$

$$(S14) \quad \frac{dM_{MET32}(t)}{dt} = \phi_1 \left( \frac{K_{a,1} P_{MET4}(t - \tau_3)}{1 + K_{a,1} P_{MET4}(t - \tau_3)} \right) - \frac{1}{\tau_1} M_{MET32}(t)$$

$$(S15) \quad \frac{dP_{MET32}(t)}{dt} = \beta_1 M_{MET32}(t) - \gamma_1 P_{MET4}(t) P_{MET32}(t) - \frac{1}{\tau_2} P_{MET32}(t)$$

$$(S16) \quad \frac{dP_{MET4,MET32,COMPLEX}(t)}{dt} = \gamma_1 P_{MET4}(t) P_{MET32}(t) - \frac{1}{\tau_2} P_{MET4,MET32,COMPLEX}(t)$$

$$(S17) \quad \frac{dM_{OUTPUT}(t)}{dt} = \phi_2 \left( \frac{K_{a,2} P_{MET4,MET32,COMPLEX}(t - \tau_3)}{1 + K_{a,2} P_{MET4,MET32,COMPLEX}(t - \tau_3)} \right) - \frac{1}{\tau_1} M_{OUTPUT}(t)$$

**Table S2: Parameter values and descriptions for simulations in Figure S4.**

| Parameter  | Description                                                                                                                                                                                  | Value                                                                    |
|------------|----------------------------------------------------------------------------------------------------------------------------------------------------------------------------------------------|--------------------------------------------------------------------------|
| $M_X(t)$   | number of mRNA molecules of species X                                                                                                                                                        | 0 (at $t = 0$ )                                                          |
| $P_X(t)$   | number of proteins of species X                                                                                                                                                              | 0 (at $t = 0$ )                                                          |
| $\phi_1$   | strength of activation of $M_{MET32}(t)$ by $P_{MET4}(t)$                                                                                                                                    | varies                                                                   |
| $\phi_2$   | strength of activation of $M_{OUTPUT}(t)$ response to $P_{MET4,MET32,COMPLEX}(t)$                                                                                                            | varies                                                                   |
| $\mu_1(t)$ | rate of transcription of <i>MET4</i> downstream of $P_{GAL1}$                                                                                                                                | $0 \text{ min}^{-1}$ prior to pulse,<br>$4 \text{ min}^{-1}$ after pulse |
| $\tau_1$   | mRNA half-life                                                                                                                                                                               | 10 min                                                                   |
| $\tau_2$   | protein half-life                                                                                                                                                                            | 20 min                                                                   |
| $\tau_3$   | effective parameter accounting for the time delay between the activator localizing to the nucleus, finding the correct binding site, recruiting RNA polymerase, and initiating transcription | 5 min                                                                    |
| $\beta_1$  | translation rate                                                                                                                                                                             | $3 \text{ min}^{-1}$                                                     |
| $K_a$      | strength of TF binding                                                                                                                                                                       | 1                                                                        |
| $\gamma_1$ | effective parameter of Met4p-Met32p complex formation with slow dissociation                                                                                                                 | $3 \text{ min}^{-1}$                                                     |

## Supplemental Figure Legends

**Figure S1: Gene expression data overview.** (A) Clustered heatmap of methionine-limited GEV experiments collected in this study. 872 genes were floored to a log<sub>2</sub>-transformed value of 0 in each array and removed prior to clustering the remaining 5384 genes. (B) The number of genes that are upregulated >2-fold (red), repressed >2-fold (green), and the sum of both (black) at each time point when GEV is induced in DBY12142 (Control).

**Figure S2: Cbf1p switches between a repressor and a co-activator of Cluster 9 genes based on choice of nutrient limitation.** Cells were grown under either 20 mg/L phosphate-limited (P) or 7.5 mg/L methionine-limited (M) growth. Cbf1p overexpression experiments are sampled out to 90 minutes. The phosphate-limited Cbf1p experiment samples are at t = 0, 5, 15, 30, 45, and 90 minutes following  $\beta$ -estradiol addition to the culture. The methionine-limited Cbf1p experiment samples are at t = 0, 2.5, 5, 15, 30, 45, 60, and 90 minutes. The GEV-only controls have an additional time-point at 2 hours. The phosphate-limited GEV-only experiment samples are at t = 0, 2.5, 5, 18, 30, 45, 60, 90 and 120 minutes. The methionine-limited GEV experiment samples are at t = 0, 2.5, 5, 15, 30, 45, 60, 90, and 120 minutes. Previously identified targets of Cbf1p are indicated in orange ( $p < 0.005$ ; Maclsaac *et al*, 2006) and cyan (Lee *et al*, 2010).

**Figure S3: The transcriptional responses of Cluster 3 and Cluster 5 genes to Cbf1p induction under phosphate (P) or methionine (M) limitation.**

**Figure S4: Simulations of feed-forward architecture.** (A) Met4p stimulates the production of *MET32* transcript (and thus, Met32p protein). Met4p then forms a complex with Met32p and stimulates the production of a target gene (marked *OUTPUT*). (B) Numerical modeling of schematic in (A). The model can be found in Equations S12-S17 in the Supplement. The parameters  $\phi_1$  and  $\phi_2$  are the strength of stimulation of *MET32* transcription by Met4p and the strength of stimulation of *OUTPUT* transcription by the Met4p-Met32p complex, respectively.

**Figure S5: Heatmap of clustered transcription factor activities calculated with MatrixREDUCE.** The activities are shown for t = 2.5, 5, 15, 30, 45, 60, and 90 minutes following  $\beta$ -estradiol pulse from the time-zero transformed data in Fig 2.

**Figure S6: Comparison of expression data with biochemically-determined TF targets.** (A) The fraction of biochemically-determined (YEASTRACT) direct targets induced or repressed at least 2-fold in response by a TF. (B) The number of targets activated (A), repressed (R), or both activated and repressed (B) at least 2-fold by a single TF.

**Figure S7: Construction of GEV-inducible alleles.** Linear fragments of KanMX4-P<sub>GAL1</sub> DNA were PCR amplified with homology to genomic targets.

Homology is chosen to place the new promoter and drug cassette between the first ATG of the *TF* open reading frame and the *TF*'s native promoter.

**Figure S8: Growth of *met6*Δ strain with different levels of methionine.** (A) Final optical density (measured in Klett units) of methionine auxotroph strain grown in YNB + varying amounts of methionine for 2 days. (B) Histograms of cell volumes from steady-state (chemostat) cultures with 3.75, 7.5, or 15 mg/L of methionine. (C) Density of steady-state cultures determined by Klett and Coulter Counter.
